# Supplementary material
Source: HighWire-hosted journal article supplement (http://hw-f5-jim.highwire.org/highwire/filestream/141613/field_highwire_adjunct_files/2/AFMR_Podcast_70_6.pdf)
Supplement: AFMR_Podcast_70_6.pdf [file AFMR_Podcast_70_6.pdf]



# AFMR

American Federation  
for Medical Research

*Develop and mentor tomorrow's leaders in medical research*

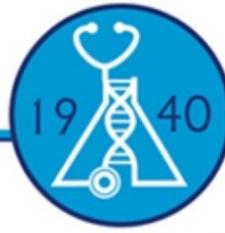

## Journal of Investigative Medicine Podcasts

[afmr.org/podcasts](https://afmr.org/podcasts)

### Reflections on my presidency and the future of AFMR

Presented Tuesday, June 21, 2022

by Samrat Das, MD

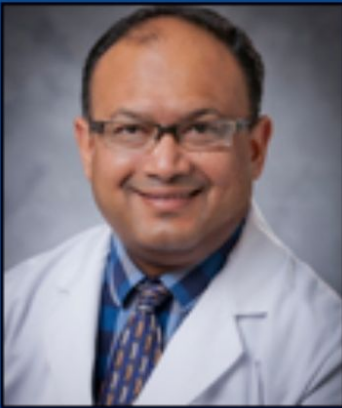

Editor-in-Chief Dr. Richard McCallum and Associate Professor of Pediatrics and the Director of Pediatric Undergraduate Medical Education at Duke University School of Medicine, Dr. Samrat Das, discuss what it has been like to be the president of the American Federation of Medical Research (AFMR) over the last year. Join us as we honor Dr. Das during his final days as president of AFMR. Dr. Das discusses advice for future presidents and his own future career plans. We are very grateful for all the work Dr. Das has done for AFMR, and we wish him the very best in his future endeavors.
